# Supplementary material for: Incidence, Predictor, and Clinical Outcomes of Multiple Resheathing With Self‐Expanding Valves During Transcatheter Aortic Valve Replacement
Source: PubMed Central journal article supplement — J Am Heart Assoc. 2021 Sep 3;10(18):e020682. doi: 10.1161/JAHA.120.020682 (PMC8649510; doi:10.1161/jaha.120.020682), 2021-09-03

# **Supplemental Material**

**Table S1. Frequency of multiple resheathing by center's annual volume with SE-THV.**

|                                    | <b>Annual volume</b> | <b>% Multiple Resheathing</b> | <b>P value</b> |
|------------------------------------|----------------------|-------------------------------|----------------|
| Centers' annual volume with SE-THV | ≤ 25 cases/year      | 7.2%                          | 0.05           |
|                                    | 25-75 cases/year     | 11.5%                         |                |
|                                    | > 75 cases/year      | 6.9%                          |                |

SE-THV = self-expanding transcatheter heart valve

**Table S2. Comparison of procedural and 30-day outcomes between the groups including only Evolut R and PRO cases.**

|                                      | <b>Overall<br/>(n=837)</b> | <b>NR<br/>(n=587)</b> | <b>SR<br/>(n=191)</b> | <b>MR<br/>(n=59)</b> | <b>P value</b> |
|--------------------------------------|----------------------------|-----------------------|-----------------------|----------------------|----------------|
| <b>Procedural outcomes</b>           |                            |                       |                       |                      |                |
| Device success                       | 738 (88.2)                 | 523 (89.1)            | 173 (90.6)            | 42 (71.2)            | <0.001         |
| Procedural death                     | 26 (3.1)                   | 20 (3.4)              | 3 (1.6)               | 3 (5.1)              | 0.3            |
| Need of a second valve               | 19 (2.3)                   | 3 (0.5)               | 6 (3.1)               | 10 (16.9)            | <0.001         |
| Prosthesis embolization              | 12 (1.4)                   | 2 (0.3)               | 3 (1.6)               | 7 (11.9)             | <0.001         |
| Tamponade                            | 13 (1.6)                   | 9 (1.5)               | 4 (2.1)               | 0                    | 0.52           |
| Coronary obstruction                 | 6 (0.7)                    | 5 (0.9)               | 1 (0.5)               | 0                    | 0.71           |
| Aortic rupture                       | 3 (0.4)                    | 3 (0.5)               | 0                     | 0                    | 0.53           |
| <b>30-day outcomes</b>               |                            |                       |                       |                      |                |
| All-cause death*                     | 30 (3.7)                   | 22 (3.8)              | 3 (1.7)               | 5 (8.6)              | 0.04           |
| Early Safety                         | 135 (16.1)                 | 99 (16.9)             | 26 (13.6)             | 10 (16.9)            | 0.56           |
| Stroke                               |                            |                       |                       |                      |                |
| All stroke                           | 21 (2.5)                   | 17 (2.9)              | 3 (1.6)               | 1 (1.7)              | 0.54           |
| Disabling Stroke                     | 12 (1.4)                   | 8 (1.4)               | 3 (1.6)               | 1 (1.7)              | 0.96           |
| Major vascular complication          | 49 (5.9)                   | 35 (6)                | 12 (6.3)              | 2 (3.5)              | 0.72           |
| Life-threatening bleeding            | 34 (4.1)                   | 24 (4.1)              | 9 (4.7)               | 1 (1.7)              | 0.6            |
| Acute kidney injury (stages 2 and 3) | 55 (6.6)                   | 40 (6.9)              | 9 (4.7)               | 6 (10.2)             | 0.31           |
| New permanent pacemaker              | 122 (14.8)                 | 83 (14.4)             | 29 (15.3)             | 10 (17.2)            | 0.83           |
| New-onset persistent LBBB            | 144 (17.7)                 | 94 (16.5)             | 36 (19.4)             | 14 (24.1)            | 0.28           |
| Moderate/severe aortic regurgitation | 24 (3.1)                   | 15 (2.8)              | 6 (3.4)               | 3 (5.6)              | 0.51           |
| Mean aortic gradient, mmHg           | 8.8±5.6                    | 8.7±5.5               | 8.3±4.8               | 11±8.2               | 0.02           |

\*Kaplan-Meier events probability estimates (log rank). LBBB= left bundle branch block.

NR=no resheathing; SR=single resheathing; MR=multiple resheathing.

**Table S3. Total number and percentage of cases included in the logistic regression analysis for multiple resheathing.**

| Univariable           |             | Multivariable         |             |
|-----------------------|-------------|-----------------------|-------------|
| Variables             | N (%)       | Variable              | N (%)       |
| Aortic regurgitation* | 1003 (97.8) | Aortic regurgitation* | 1003 (97.8) |
| Balloon predilation   | 1026 (100)  | Balloon predilation   | 1003 (97.8) |
| Evolut PRO†           | 1026 (100)  | -                     | -           |
| Portico†              | 1026 (100)  | Portico†              | 1003 (97.8) |

\*Moderate or severe aortic regurgitation at baseline; †Evolut R/PRO as reference.

**Table S4. Total number and percentage of cases included in the logistic regression analysis for device success.**

| Univariable                              |             | Multivariable                            |             |
|------------------------------------------|-------------|------------------------------------------|-------------|
| Variables                                | N (%)       | Variable                                 | N (%)       |
| COPD                                     | 1026 (100)  | -                                        | -           |
| Aortic regurgitation*                    | 1003 (97.8) | Aortic regurgitation*                    | 1003 (97.8) |
| Balloon predilation                      | 1026 (100)  | -                                        | -           |
| Balloon postdilation                     | 1026 (100)  | -                                        | -           |
| Evolut PRO†                              | 1026 (100)  | -                                        | -           |
| Portico‡                                 | 1026 (100)  | Portico‡                                 | 1003 (97.8) |
| Multiple resheathing                     | 1026 (100)  | Multiple resheathing                     | 1003 (97.8) |
| SE-THV center annual volume <25 cases‡   | 1026 (100)  | SE-THV center annual volume <25 cases‡   | 1003 (97.8) |
| SE-THV center annual volume 26-75 cases‡ | 1026 (100)  | SE-THV center annual volume 26-75 cases‡ | 1003 (97.8) |

COPD=Chronic obstructive pulmonary disease; SE-THV=Self-expanding transcatheter heart valve; \*Moderate or severe aortic regurgitation at baseline; †Evolut R as the reference; ‡SE-THV center annual volume >75 as reference.

**Table S5. Total number and percentage of cases included in the proportional hazard regression for the cumulative mortality at 1 year analysis for device success.**

| Univariable                              |             | Multivariable                            |            |
|------------------------------------------|-------------|------------------------------------------|------------|
| Variables                                | N (%)       | Variables                                | N (%)      |
| COPD                                     | 1026 (100)  | COPD                                     | 1026 (100) |
| Afib*                                    | 1026 (100)  | Afib*                                    | 1026 (100) |
| Cerebrovascular disease                  | 1026 (100)  | -                                        | -          |
| Aortic regurgitation†                    | 1003 (97.8) | -                                        | -          |
| Evolut PRO‡                              | 1026 (100)  | -                                        | -          |
| Portico‡                                 | 1026 (100)  | -                                        | -          |
| Multiple Resheathing                     | 1026 (100)  | Multiple resheathing                     | 1026 (100) |
| SE-THV center annual volume <25 cases§   | 1026 (100)  | SE-THV center annual volume <25 cases§   | 1026 (100) |
| SE-THV center annual volume 26-75 cases§ | 1026 (100)  | SE-THV center annual volume 26-75 cases§ | 1026 (100) |

COPD=Chronic obstructive pulmonary disease; SE-THV=Self-expanding transcatheter heart valve;  
 \*Afib= atrial fibrillation at baseline; †Moderate or severe aortic regurgitation at baseline; ‡Evolut R as the reference; §SE-THV center annual volume >75 as reference.

**Figure S1. Comparison of Kaplan-Meier cumulative mortality curves at 1-year including only the Evolut R and PRO cases.**

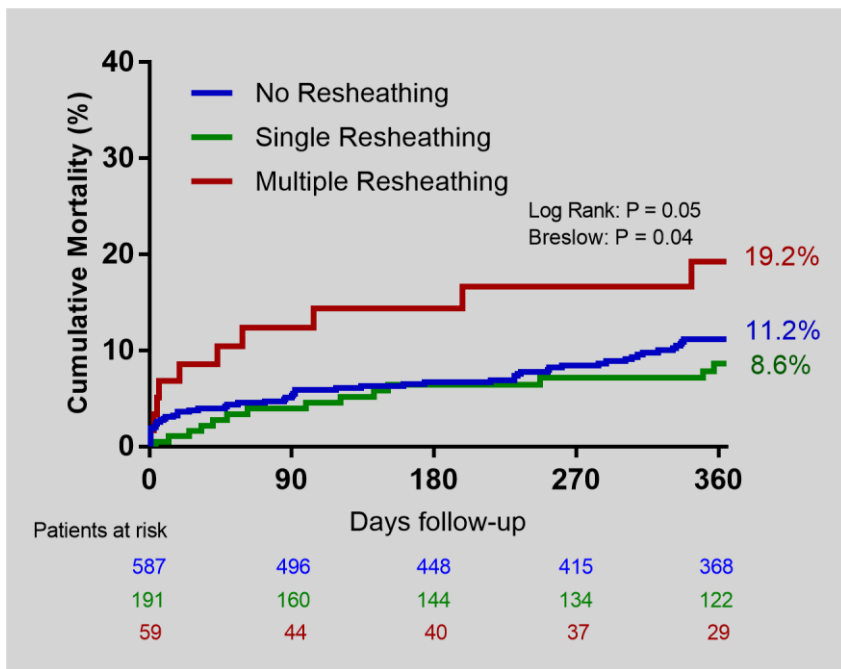

Supplement: JAH3-10-e020682-s001.pdf [file JAH3-10-e020682-s001.pdf]
